# Supplementary material for: Mesoporous graphene-like carbon sheet: high-power supercapacitor and outstanding catalyst support
Source: Royal Society of Chemistry journal article supplement (doi:10.1039/c4ta02307b), 2014-01-01
Supplement: c4ta02307b1.pdf [file c4ta02307b1.pdf]

## Supporting Information

# Mesoporous Graphene-like Carbon Sheet: High-Power Supercapacitor and Outstanding Catalyst Support

*Pengfei Zhang,<sup>†\*</sup> Zhen-An Qiao,<sup>†</sup> Zhiyong Zhang,<sup>†</sup> Shun Wan,<sup>†</sup> and Sheng Dai<sup>†,‡\*</sup>*

<sup>†</sup>Chemical Sciences Division, Oak Ridge National Laboratory, Oak Ridge 37831,  
Tennessee, USA

<sup>‡</sup>Department of Chemistry, University of Tennessee, Knoxville, TN 37996, USA

## Supporting Figures and Tables

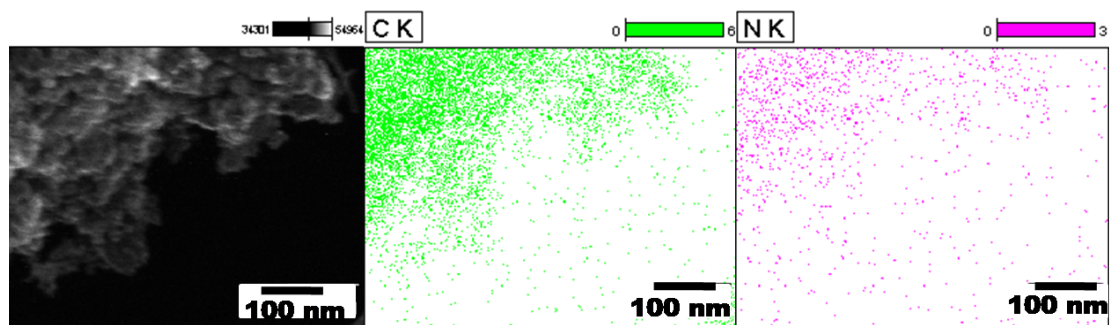

**Figure S1.** Elemental mapping pictures of MCS-1@800 sample (molten salt/carbon precursor = 5 by weight, activation time: 5 hours). Nitrogen atoms were evenly distributed throughout the carbon sheet material.

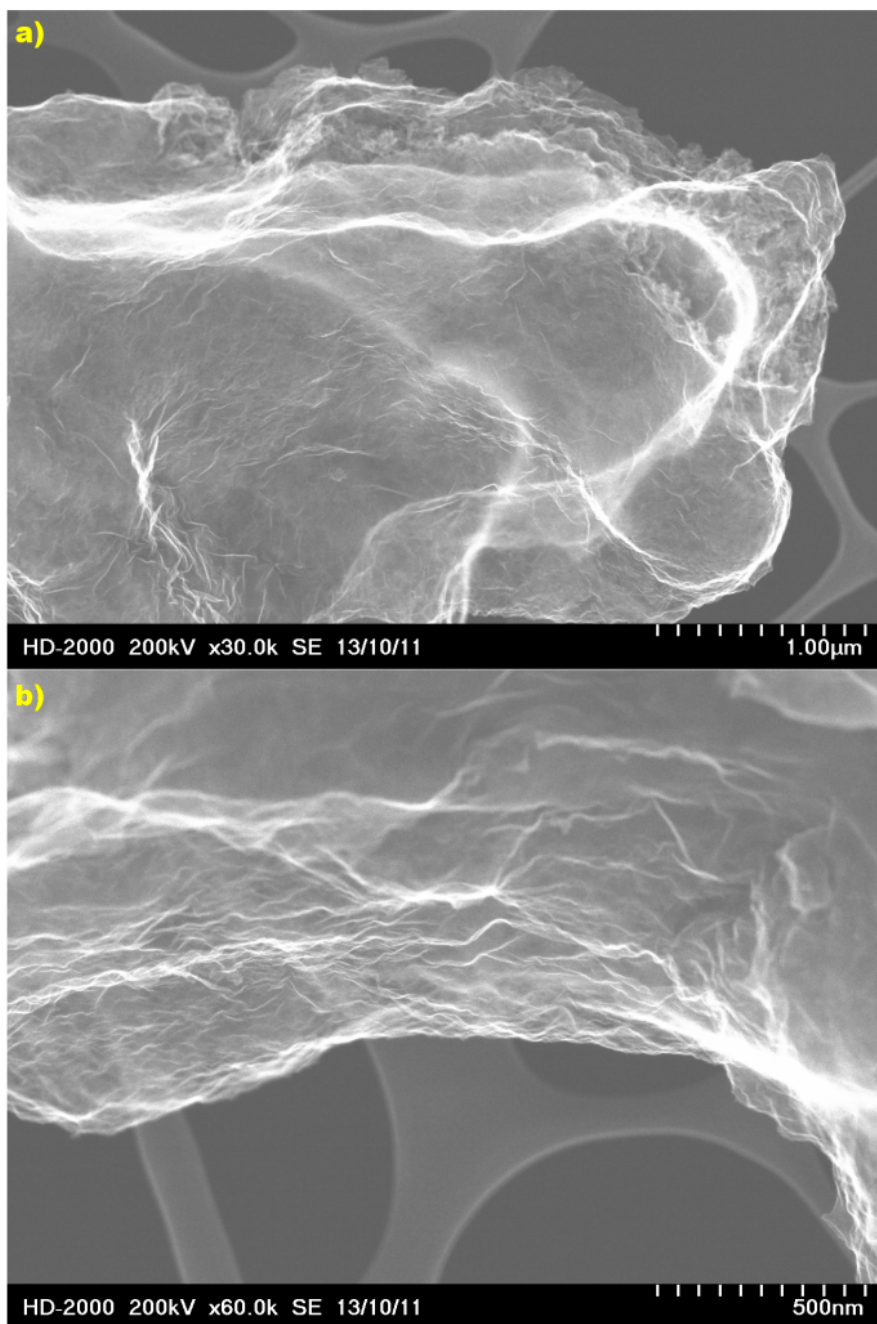

**Figure S2.** SEM image of MCS-1@600 sample.

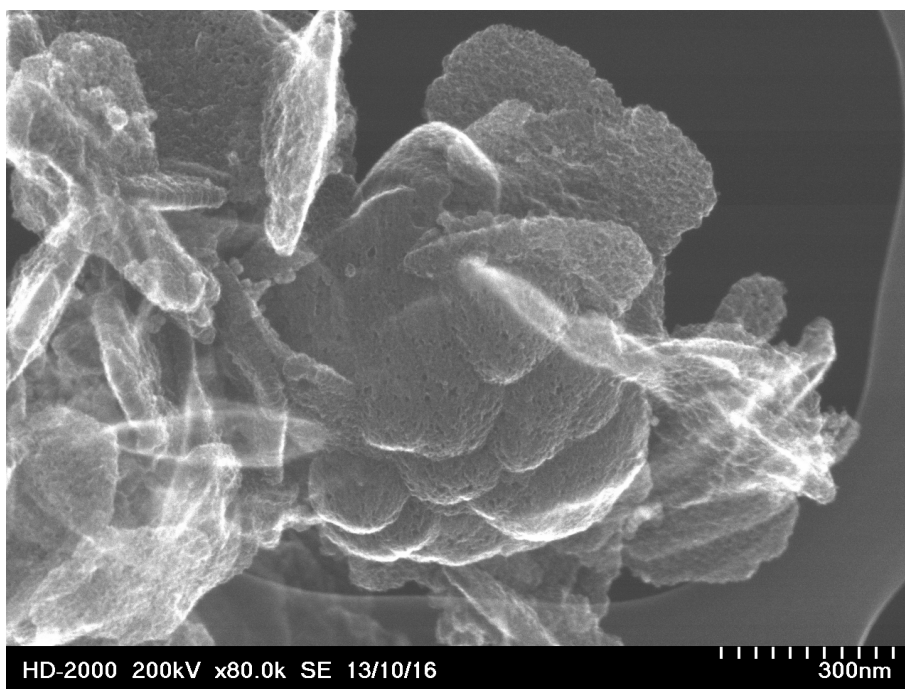

**Figure S3.** SEM image of MCS-2@800 sample.

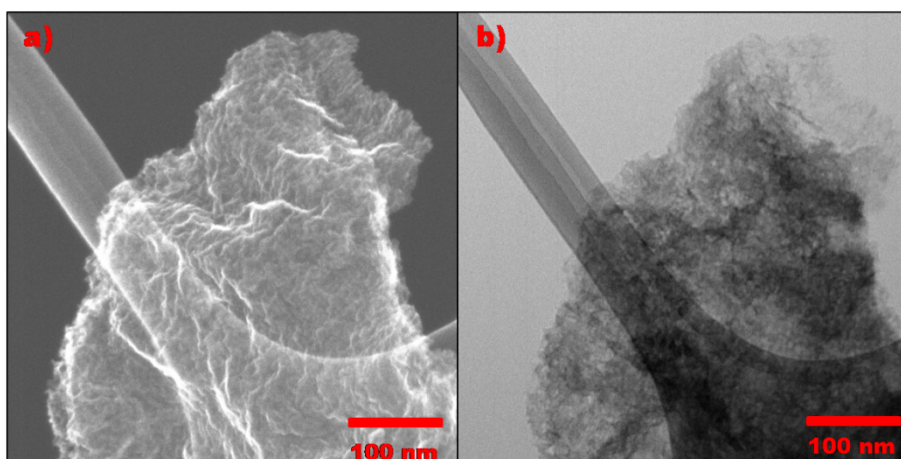

**Figure S4.** SEM and TEM images of MCS-3@800 sample.

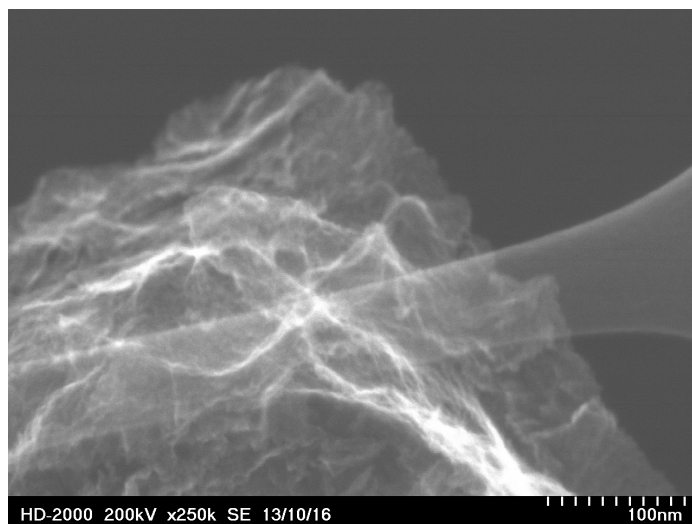

Figure S5. SEM image of MCS-1@800 sample produced by recovered salts.

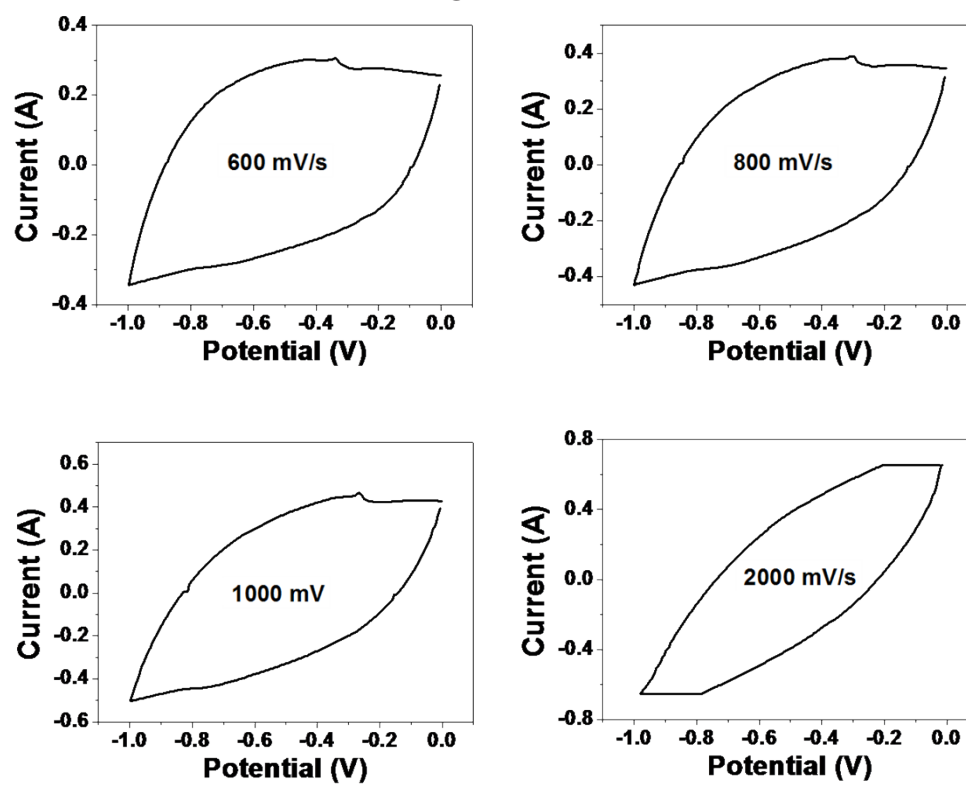

Figure S6. CV curves of activated carbon at different scan rates.

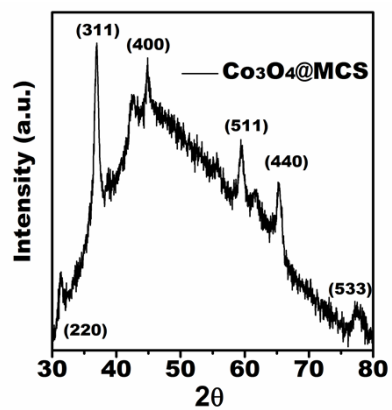

Figure S7. XRD patterns of  $\text{Co}_3\text{O}_4@\text{MCS}$ -1 sample.

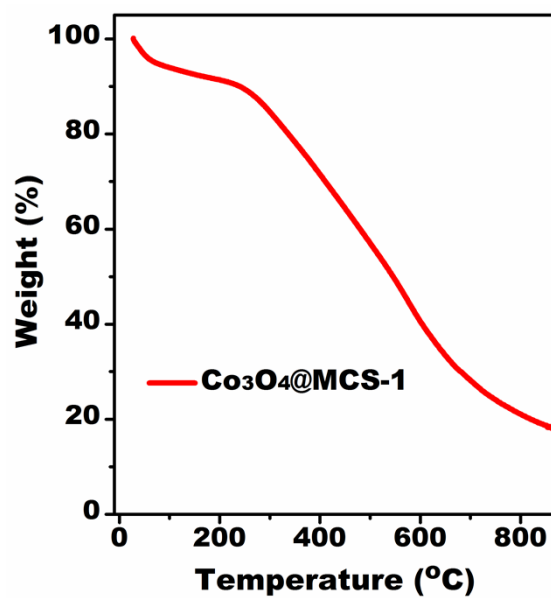

Figure S8. TGA analysis of  $\text{Co}_3\text{O}_4@\text{MCS}$ -1 sample in air.

**Table S1.** Summary of BET surface areas for carbon samples from different reaction conditions.

| Carbon Precursor | Molten Salts          | Temperature | S <sub>BET</sub><br>(m <sup>2</sup> /g) |
|------------------|-----------------------|-------------|-----------------------------------------|
| PMDA+BDI         | KCl-ZnCl <sub>2</sub> | 425         | 293                                     |
| PMDA+BDI         | KCl-LiCl              | 425         | 87                                      |
| PMDA+BDI         | KCl-ZnCl <sub>2</sub> | 800         | 2174                                    |
| PMDA+BDI         | KCl-LiCl              | 800         | No Product                              |

<sup>a</sup> PMDA: pyromellitic dianhydride; BDI: benzidine; carbon precursor/molten salts = 1/9 by weight.

### Supplement Note 1

In the synthesis of polyimide, it was observed that an MCS-1@180 sample prepared with ionic liquids as solvent (S<sub>BET</sub>: 118 m<sup>2</sup>/g) possessed higher BET surface area than the corresponding sample (S<sub>BET</sub>: 37 m<sup>2</sup>/g) from neutral organic solvent (*m*-cresol). The organic molten salts, ionic liquids, could promote the formation of porosity in polyimide
